# Supplementary material
Source: Springer Nature journal article supplement (https://www.springermedizin.de/resource/supplementary/12872_2011_411_MOESM1_ESM.pdf/9429906)

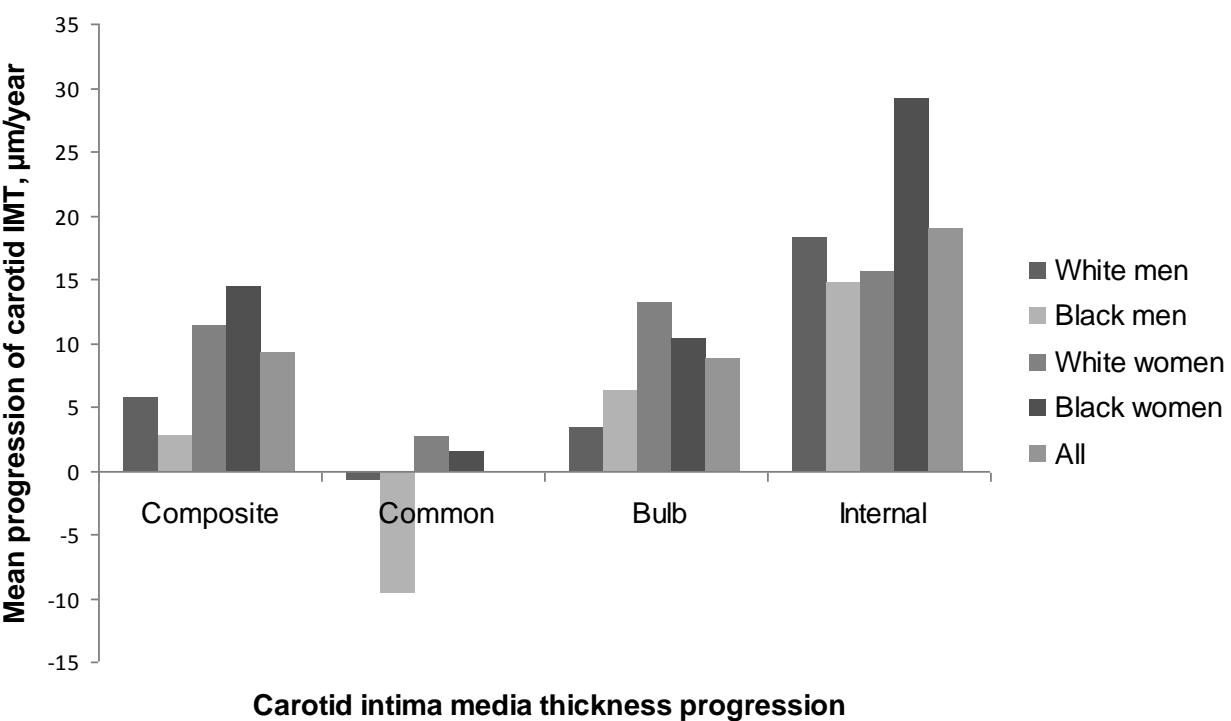

Supplement: MOESM1 [file 9429906]
